# Supplementary material for: Endothelial METTL3 (Methyltransferase-Like 3) Inhibits Fibrinolysis by Promoting PAI-1 (Plasminogen Activator Inhibitor-1) Expression Through Enhancing Jun Proto-Oncogene N6-Methyladenosine Modification
Source: PubMed Central journal article supplement — Arterioscler Thromb Vasc Biol. 2021 Oct 14;41(12):2877–89. doi: 10.1161/ATVBAHA.121.316414 (PMC8608005; doi:10.1161/atvbaha.121.316414), 2021-10-14
Supplement: atv-41-2877-s001.pdf [file atv-41-2877-s001.pdf]

## SUPPLEMENTAL MATERIAL

# Endothelial METTL3 (methyltransferase-like 3) Inhibits Fibrinolysis by Promoting PAI-1 Expression through Enhancing JUN m<sup>6</sup>A Modification

Qin Bai, Yao Lu, Yanhua Chen, Han Zhang, Weiwei Zhang, Huang Wu, Aiqing Wen

### Affiliations:

Department of blood transfusion, Daping Hospital, Army Medical University, Chongqing 400042, China.

### Correspondence to:

Aiqing Wen  
Army Medical University  
No 10, Changjiang Branch Road, Chongqing, 400042 China.  
E-mail: [dpysxkwaq@hotmail.com](mailto:dpysxkwaq@hotmail.com)  
Tel: 086-023-68729631 Fax: 086-023-68729631

Huang Wu  
Army Medical University  
No 10, Changjiang Branch Road, Chongqing, 400042 China.  
E-mail: [wuhuang2019@126.com](mailto:wuhuang2019@126.com)  
Tel: 086-023-68757654 Fax: 086-023-68757654

### This PDF file includes:

- Major Resources Table
- Supplemental Figures I to VII
- Supplemental Tables I to II

## Major Resources Table

In order to allow validation and replication of experiments, all essential research materials listed in the Methods should be included in the Major Resources Table below. Authors are encouraged to use public repositories for protocols, data, code, and other materials and provide persistent identifiers and/or links to repositories when available. Authors may add or delete rows as needed.

### Animals (in vivo studies)

| Species | Vendor or Source                                                     | Background Strain | Sex             | Persistent ID / URL |
|---------|----------------------------------------------------------------------|-------------------|-----------------|---------------------|
| Mouse   | Laboratory Animal Center, Daping Hospital of Army Medical University | C57BL/6J          | Male and female |                     |

### Genetically Modified Animals

|                 | Species                             | Vendor or Source            | Background Strain | Other Information | Persistent ID / URL |
|-----------------|-------------------------------------|-----------------------------|-------------------|-------------------|---------------------|
| Parent - Male   | Tie2 <sup>Cre</sup> mice            | The Jackson Laboratory      | C57BL/6J          |                   |                     |
| Parent - Female | <i>Mettl3</i> <sup>flxed</sup> mice | Chinese Academy of Sciences | C57BL/6J          |                   |                     |

### Antibodies

| Target antigen           | Vendor or Source          | Catalog #  | Working concentration | Lot # (preferred but not required) | Persistent ID / URL |
|--------------------------|---------------------------|------------|-----------------------|------------------------------------|---------------------|
| METTL3                   | ABclonal                  | A8370      | 1:2000                |                                    |                     |
| PAI-1                    | Abcam                     | ab182973   | 1:1000                |                                    |                     |
| JUN                      | Cell Signaling Technology | 9165S      | 1:500                 |                                    |                     |
| YTHDF1                   | Proteintech               | 17479-1-AP | 1:4000                |                                    |                     |
| GAPDH                    | Proteintech               | 10494-1-AP | 1:10000               |                                    |                     |
| Flag                     | Proteintech               | 20543-1-AP | 1:2000                |                                    |                     |
| m <sup>6</sup> A         | Abcam                     | ab151230   | 2µg/mL                |                                    |                     |
| Anti-rabbit IgG HRP      | santa cruz biotechnology  | sc-2357    | 1:5000                |                                    |                     |
| Anti-mouse IgG HRP       | Proteintech               | SA00001-1  | 1:5000                |                                    |                     |
| Anti-rabbit IgG (Cy3)    | Abcam                     | ab6939     | 1:500                 |                                    |                     |
| Mouse IgG                | Abcam                     | Ab37355    | 1:1000                |                                    |                     |
| Anti-fibrin (clone 59D8) | Merck                     | MABS2155   | 1ug/ml                |                                    |                     |
| CD31                     | Biologend                 | 102502     | 5ug/ml                |                                    |                     |
| ICAM-2                   | Biologend                 | 105602     | 5ug/ml                |                                    |                     |

### DNA/cDNA Clones

| Clone Name | Sequence | Source / Repository | Persistent ID / URL |
|------------|----------|---------------------|---------------------|
|------------|----------|---------------------|---------------------|

|        |                                                                                                                                                                                                                                                                                                                                                                                                                                                                                                                                                                                                                                                                                                                                                                                                                                                                                                                                                                                                                                                                                                                                                                                                                                                                                                                                                                                                                                                                                                                                                                                                                                                                                                                                                                                                                                                                                                                                                                    |  |  |
|--------|--------------------------------------------------------------------------------------------------------------------------------------------------------------------------------------------------------------------------------------------------------------------------------------------------------------------------------------------------------------------------------------------------------------------------------------------------------------------------------------------------------------------------------------------------------------------------------------------------------------------------------------------------------------------------------------------------------------------------------------------------------------------------------------------------------------------------------------------------------------------------------------------------------------------------------------------------------------------------------------------------------------------------------------------------------------------------------------------------------------------------------------------------------------------------------------------------------------------------------------------------------------------------------------------------------------------------------------------------------------------------------------------------------------------------------------------------------------------------------------------------------------------------------------------------------------------------------------------------------------------------------------------------------------------------------------------------------------------------------------------------------------------------------------------------------------------------------------------------------------------------------------------------------------------------------------------------------------------|--|--|
| METTL3 | <p>gattacaaggatgacgatgacaagtcggacacgtggagctctatccaggcccacaa<br/> gaagcagctggactctctcgggagaggctgcagcggaggcgggaagcaggactc<br/> ggggcacttggatctacggaatccagaggcagcattgtctccaacctccgtagtgac<br/> agcccagtgctactgcacccacctctggtggccctaagcccagcacagcttcagca<br/> gttctgaattagctacagatcctgagttagagaagaagttgctacaccacctctgat<br/> ctggccttaacattgccactgatgtgttccatctgtcttccatctccacgccagatg<br/> ctcctgccactcaagatgggtagaaagcctcctgcagaagtttcagctcaggagtt<br/> gattgaggtaaagcgaggtctcctacaagatgatgcacatcctactcttgaacctatg<br/> ctgaccattccaagctctctgccatgatgggtgctgtggcagaaaagaagggccctg<br/> gggaggtgacagggactgtcacagggcagaagcggcggtgcagaacaggactcg<br/> actacagtagctgcctttgccagttcgtagtctctggtctgaactcttcagcatcggaac<br/> cagcaaaggagccagccaagaatcaaggaaacatgtgcctcagatgttgatctg<br/> gagatagagagccttctgaaccaacagtcactaaggaacaacagagcaagaag<br/> gtcagtcaggagatcctagagctattaataactacaacagccaaggaacaatccatt<br/> gttgaaaaatttcgctctcgaggtcgggccaagtgaagaattctgtgactatggaac<br/> caaggaggatgcatgaaagccagtgatgtgatcgacctgtcgcaagctgcact<br/> cagacgaattatcaataaacacactgatgagcttttaggtgactgctttccttaataca<br/> tgttccacatggatacctgtaataacgtacattacgagattgatgcttgcattgattctg<br/> aggccctggcagcaaagaccacacgccaagccaggagcttgccttacacagag<br/> tgtcggaggtgattccagtcgagaccgactctcccacctcagtgatctgttgat<br/> ccgtacctggacgtcagatcttgggcaagtttcagttgtgatggctgacctacctg<br/> ggatattcacatggaactgccctatgggacctgacagatgatgagatgagcaggct<br/> caacatacccgtactacaggatgatggcttctctcctctgggtcacagggcaggcca<br/> tggagttggggagagaatgtctaaatctctggggatgaacgggtagatgaaattatt<br/> tgggtgaagacaaatcaactgcaacgcattcggacaggccgtacaggtcactg<br/> gttgaacctgggaaggaacactgcttgggtgtcaaaggaatcccaaggcttc<br/> aaccagggctggattgtgatgtgatcgtagctgaggttcgtccaccagtcataaacc<br/> agatgaaatctatggcatgattgaaagactatctcctggcactcgcaagattgattatt<br/> tggacgaccacacaatgtgcaaccaactggatcaccttgaaaccaactggatg<br/> ggatccacctactagaccagatgtgggtgcacggttaagcaaaggtaccagatg<br/> gatcatctctaaccctaagaattatag</p> |  |  |
| JUN    | <p>gattacaaggatgacgacgataagactgcaaagatggaaacgaccttctatgacga<br/> tgcctcaacgctcgttctcccgtccgagagcggaccttatggctacagtaacccc<br/> aagatcctgaaacagagcatgacctgaacctggccgacctcagtgaggagcctga<br/> agccgacctccgccaagaactcggacctcctcacctgcccagctggggctg<br/> ctcaagctggcgtgcccagctggagcgcctgataatccagtccagcaacgggca<br/> catcaccaccagccgacccccaccagttcctgtgccccagaacgtgacagatg<br/> agcaggagggcttcgagggctcgtgagcgcctggccgaactgcacagcca<br/> gaacacgctgcccagcgtcacgtcggcggcgagccggtcaacggggcaggcat<br/> gggtgctcccgcggtagcctcgggtggcagggggcagcggcagcggcggctcagc<br/> gccagcctgcacagcagccgctctacgcaaacctcagcaactcaaccag<br/> gctgctgagcagcggcggcggcggcctcctacggcggcggcggcctggcctt<br/> cccgcgaaccccagcagcagcagcagccgcccaccacctgccccagcagatg<br/> cccgtgcagcaccgcggtgcagggcctgaaggaggagcctcagacagtgccc<br/> gagatgcccggcagacaccgcccctgtccccatcgacatggagtcccaggagc<br/> ggatcaaggcggagaggaagcgcagatgaggaaccgcatcgtgctccaagtgc<br/> gaaaaaggaagctggagagaatcggcggctggaggaaaaagtgaaaacctga<br/> aagctcagaactcggagctggcgtccacggccaacatgctcagggaaacaggtggc<br/> acagctaaacagaaagtcagtaaccacgtaacagtggtgccaactcatgctaac<br/> gcagcagttgcaaacatttga</p>                                                                                                                                                                                                                                                                                                                                                                                                                                                                                                                                                                                                                                                                                                                                                                                                                                |  |  |
| PAI-1  | <p>gattacaaggatgacgacgataagcagatgtctccagccctcacctgcctagtcctgg<br/> gcctggccctgtcttgggtgaagggtctgctgtgcacatccccatcctacgtggccc<br/> acctggcctcagactcggggtgagggttttcagcaggtggcgcaggcctccaagg<br/> accgcaacgtggtttctcacctatggggtggcctcgggttggccatgctccagctga<br/> caacaggaggagaacccagcagcagattcaagcagctatgggattcaagattga<br/> tgacaaggcatggccccgcctccggcatctgtacaaggagctcatggggccat</p>                                                                                                                                                                                                                                                                                                                                                                                                                                                                                                                                                                                                                                                                                                                                                                                                                                                                                                                                                                                                                                                                                                                                                                                                                                                                                                                                                                                                                                                                                                                                                                                |  |  |

|  |                                                                                                                                                                                                                                                                                                                                                                                                                                                                                                                                                                                                                                                                                                                                                                                                                                                                                                                                                                                                    |  |  |
|--|----------------------------------------------------------------------------------------------------------------------------------------------------------------------------------------------------------------------------------------------------------------------------------------------------------------------------------------------------------------------------------------------------------------------------------------------------------------------------------------------------------------------------------------------------------------------------------------------------------------------------------------------------------------------------------------------------------------------------------------------------------------------------------------------------------------------------------------------------------------------------------------------------------------------------------------------------------------------------------------------------|--|--|
|  | <p>ggaacaaggatgagatcagcaccacagacgcgatcttctgtccagcgggatctgaa<br/> gctgggtccagggttcatgccccacttctcaggctgttccggagcacgggtcaagcaa<br/> gtggacttttcagaggtggagagagccagattcatcatcaatgactgggtgaagaca<br/> cacacaaaaggatgatcagcaactgcttgggaaaggagccgtggaccagctgac<br/> acggctggtgctggtgaatgcctctacttcaacggccagtgaagactccctcccc<br/> gactccagcaccaccgcccctctccacaaatcagacggcagcactgtctctgtg<br/> cccatgatggctcagaccaacaagttcaactatactgagttcaccacgcccgatggc<br/> cattactacgacatcctggaactgcctaccacggggacaccctcagcatgttcattg<br/> ctgcccctatgaaaaagaggtgcctctctgcccctaccaacattctgagtgcccag<br/> ctcatcagccactggaaaggcaacatgaccaggctgccccgctctggttctgccc<br/> aagttctccctggagactgaagtgcacctcaggaagcccctagagaacctgggaat<br/> gaccgacatgttcagacagttcaggctgacttcacgagctttcagaccaagagcctc<br/> tccacgtcgcgcaggcgcctgcagaaagtgaagatcgaggtaacgagagtggtcac<br/> ggtggcctcctcatccacagctgcatagtctcagcccgatggccccgaggagatc<br/> atcatggacagacccttcttctgtggtccggcacaacccccacaggaacagtccttt<br/> catgggccaagtgatggaaccctga</p> |  |  |
|--|----------------------------------------------------------------------------------------------------------------------------------------------------------------------------------------------------------------------------------------------------------------------------------------------------------------------------------------------------------------------------------------------------------------------------------------------------------------------------------------------------------------------------------------------------------------------------------------------------------------------------------------------------------------------------------------------------------------------------------------------------------------------------------------------------------------------------------------------------------------------------------------------------------------------------------------------------------------------------------------------------|--|--|

### Cultured Cells

| Name    | Vendor or Source                       | Sex (F, M, or unknown) | Persistent ID / URL |
|---------|----------------------------------------|------------------------|---------------------|
| HUVEC   | Cell Bank, Chinese Academy of Sciences | unknown                |                     |
| HEK293T | Cell Bank, Chinese Academy of Sciences | unknown                |                     |

### shRNA oligonucleotide sequences

| Gene                | Forward                                                        | Reverse                                                        |
|---------------------|----------------------------------------------------------------|----------------------------------------------------------------|
| <b>Homo sapiens</b> |                                                                |                                                                |
| METTL3              | CCGGGCAAGTATGTTCACTATGAACTCGA<br>GTTTCATAGTGAACATACTTGCTTTTTG  | AATTCAAAAAGCAAGTATGTTCACTATGAAA<br>CTCGAGTTTCATAGTGAACATACTTGC |
| YTHDF1              | CCGGCCCGAAAGAGTTTGAGTGGAACCTCG<br>AGTTCCACTCAAACCTTTTCGGGTTTTG | AATTCAAAAACCCGAAAGAGTTTGAGTGGA<br>ACTCGAGTTCCACTCAAACCTTTTCGGG |
| JUN                 | CCGGCGCAAACCTCAGCAACTTCAACTCG<br>AG TTGAAGTTGCTGAGGTTTGCGTTTTG | AATTCAAAACGCAAACCTCAGCAACTTCAA<br>CTCGAGTTGAAGTTGCTGAGGTTTGCG  |
| PAI-1               | CCGGTCTCTGCCCTACCAACATTCCTCGA<br>GGAATGTTGGTGAGGGCAGAGATTTTTG  | AATTCAAAATCTCTGCCCTACCAACATTC<br>CTCGAGGAATGTTGGTGAGGGCAGAGA   |
| scramble            | CCGGCCTAAGGTTAAGTCGCCCTCGCTCG<br>AGCGAGGGCGACTTAACCTTAGGTTTTG  | AATTCAAAACCTAAGGTTAAGTCGCCCTC<br>GCTCGAGCGAGGGCGACTTAACCTTAGG  |

### qPCR primer information

| Gene                | Forward                   | Reverse                 |
|---------------------|---------------------------|-------------------------|
| <b>Homo sapiens</b> |                           |                         |
| METTL3              | AGTCCACTAAGGAACAACAGAG    | ATTCTGTGACTATGGAACCAAG  |
| YTHDF1              | TTCGTTACATCAGAAGGATACA    | GTAATAGCTGGACAGGTAGGG   |
| JUN                 | CTGTTCTATGACTGCAAAGATG    | GGGTTACTGTAGCCATAAGGT   |
| PAI-1               | AGGGCTTCATGCCCCACTTCTTCA  | AGTAGAGGGCATTACCAGCACCA |
| TFPI                | ATTTATATATGGGGGATGTGAA    | CCTGGTAATATAACCTCGACAT  |
| t-PA                | GATGATATAACCAGCAACATCAG   | AACTTTTGACAGGCACTGAG    |
| u-PA                | TAAGTCAAAAACCTGCTATGAG    | GTACGTTTGCTGAAGGACAG    |
| ITGA2               | TTCCA AATGTTACTGAGATGAA   | TGTAATACTGATTCCCACATTG  |
| SLC7A11             | GGAAGAGATTCAAGTATTACGC    | CATGGATATACATATTGCAAGG  |
| SERPINE2            | GCATTACTIONGACATGTTTGATTG | ACTGACTTCAATTTTTGCTTTT  |

|              |                                 |                            |
|--------------|---------------------------------|----------------------------|
| UPP1         | TCATAAAGCTGCTGTA CTATGC         | CTGCTCTGTTATGACCACAGT      |
| EMP1         | TGGAAAAACTGTACCAACATTA          | GCAATGACACAGAAGATGATAG     |
| LYN          | ACGATGGAGTAGATTTGAAGAC          | GTTCTCTGGATCTTTAGTTTG      |
| YTHDF2       | GGAAACAAAGTACAAAATGGAT          | GAGGGACTGTAGTAACTGGGTA     |
| GAPDH        | TCTCCTCTGACTTCAACAGCGACA        | CCCTGTTGCTGTAGCCAAATTCGT   |
| <b>Mouse</b> |                                 |                            |
| Mettl3       | TCACTATGAAATTGATGCTTGT          | GATATCACAACAGATCCACTGA     |
| Jun          | AAGATGGAAACGACCTTCTAC           | GTCATGCTCTGTTTTAGGATCT     |
| Pai-1        | ACATCTTGGATGCTGAACTC            | CTTCAGTCTCCAGAGAGA ACTT    |
| Gapdh        | CGACTTCAACAGCAACTCCACTCTT<br>CC | TGGGTGGTCCAGGGTTTCTTACTCCT |

### Me-RIP-qPCR primers

| Gene                   | Forward               | Reverse                |
|------------------------|-----------------------|------------------------|
| <b>Homo sapiens</b>    |                       |                        |
| JUN m <sup>6</sup> A   | GGGTTACTGTAGCCATAAGGT | CTGTTCTATGACTGCAAAGATG |
| GAPDH m <sup>6</sup> A | TCAAGGCTGAGAACGGGAAG  | GGACTCCACGACGTACTCAG   |

### Primers used for ChIP

| Gene                | Forward                 | Reverse                 |
|---------------------|-------------------------|-------------------------|
| <b>Homo sapiens</b> |                         |                         |
| PAI-1               | CTGAGA ACTTCAGGTAGGAGAA | GGAAAAGAAAATAGAGGAATAGC |
| ACTB                | CCTCATGGCCTTGTACACAGAG  | GCCCTTCTCACTGGTTCTCT    |

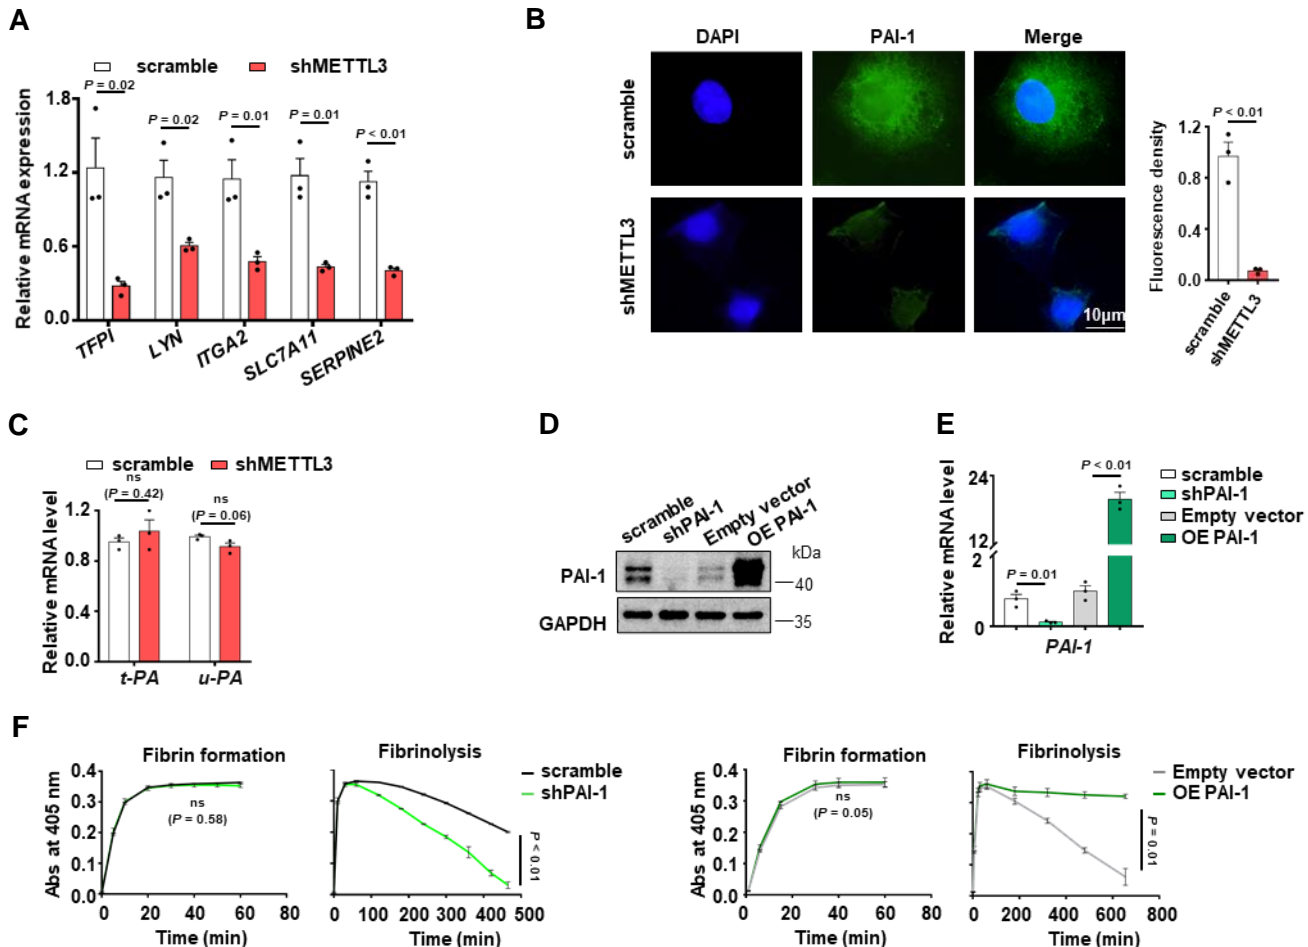

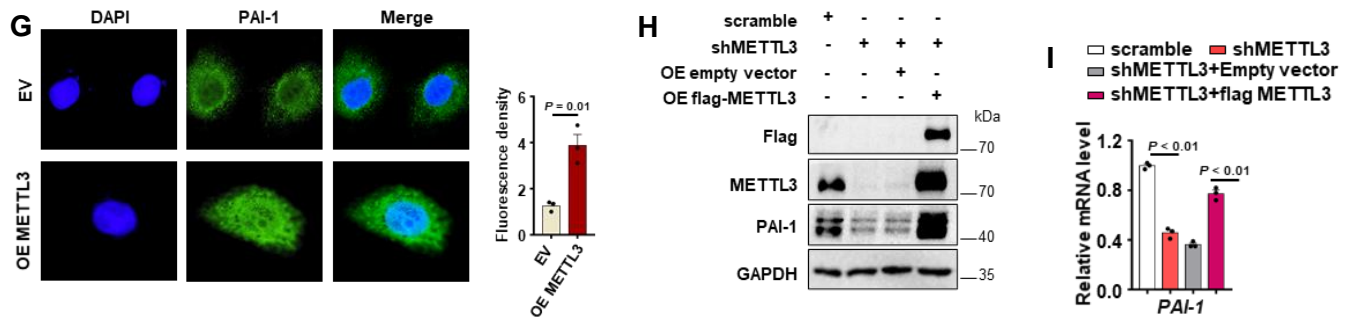

**Figure I . METTL3 impaires fibrinolytic ability by elevating PAI-1 levels.**

(A) qPCR analysis of *TFPI*, *LYN*, *ITGA2*, *SLC7A11*, *SERPINE2* mRNA expression in shMETTL3 HUVECs and control cells (n=3, data are mean  $\pm$  SEM). (B) Immunofluorescence measured the expression of PAI-1 in control and shMETTL3 HUVECs (n=3, data are mean  $\pm$  SEM). (C) qPCR analysis of *t-PA* and *u-PA* mRNA expression in shMETTL3 HUVECs and control cells (n=3, data are mean  $\pm$  SEM). (D-E) Western blot and qPCR detected the expression of PAI-1 in PAI-1 knockdown and overexpressed HUVECs (n=3, data are mean  $\pm$  SEM). (F) Fibrin formation and fibrinolysis were shown in shPAI-1 HUVECs and PAI-1 overexpressed HUVECs (n=3, data are mean  $\pm$  SEM). (G) Immunofluorescence detected the expression of PAI-1 in control and OE METTL3 HUVECs (n=3, data are mean  $\pm$  SEM). (H-I) Western blot and qPCR were conducted to detect the protein (H) and mRNA (I) level of PAI-1 in HUVECs after METTL3 intervention (n=3, data are mean  $\pm$  SEM). OE: overexpression; EV: Empty vector.

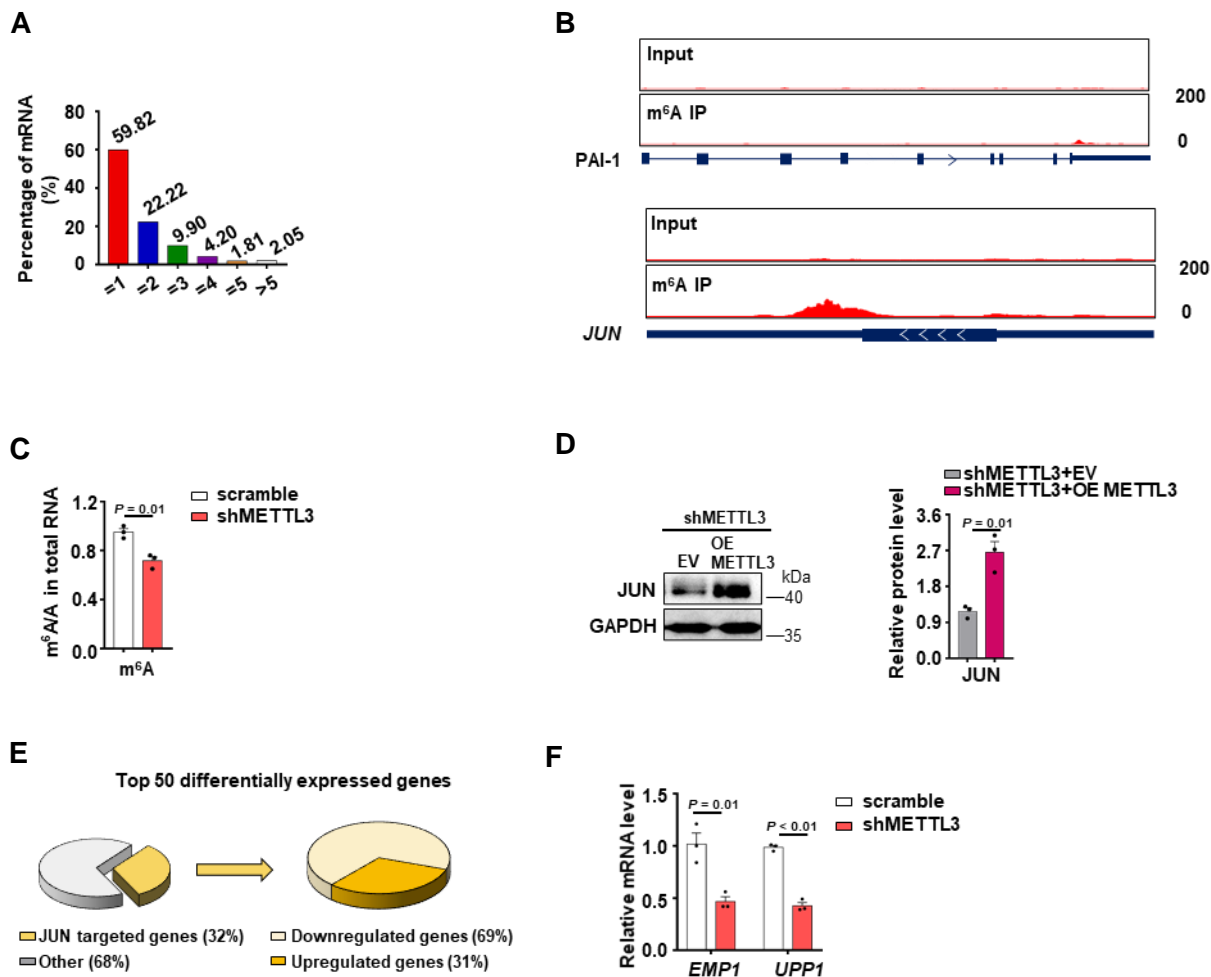

**Figure II . METTL3 mediates *JUN* mRNA m<sup>6</sup>A modification.**

(A) Percentage of m<sup>6</sup>A-methylated mRNAs with different numbers of m<sup>6</sup>A peaks. (B) m<sup>6</sup>A-seq detected the abundance of m<sup>6</sup>A on *PAI-1* and *JUN* mRNA. (C) m<sup>6</sup>A level was qualitative using an antibody-mediated m<sup>6</sup>A capture assay in shMETTL3 HUVECs (n=3, data are mean ± SEM). (D) Western blot along with the quantification in METTL3 rescued HUVECs (n=3, data are mean ± SEM). (E) Pie chart depicted the targets of JUN transcription factor among the top 50 differentially expressed genes in RNA-Seq (fold change >2 and adjusted *p*-value <0.05). (F) qPCR measured the mRNA expression of *UPP1* and *EMP1* (n=3, data are mean ± SEM). OE: overexpression, EV: empty vector.

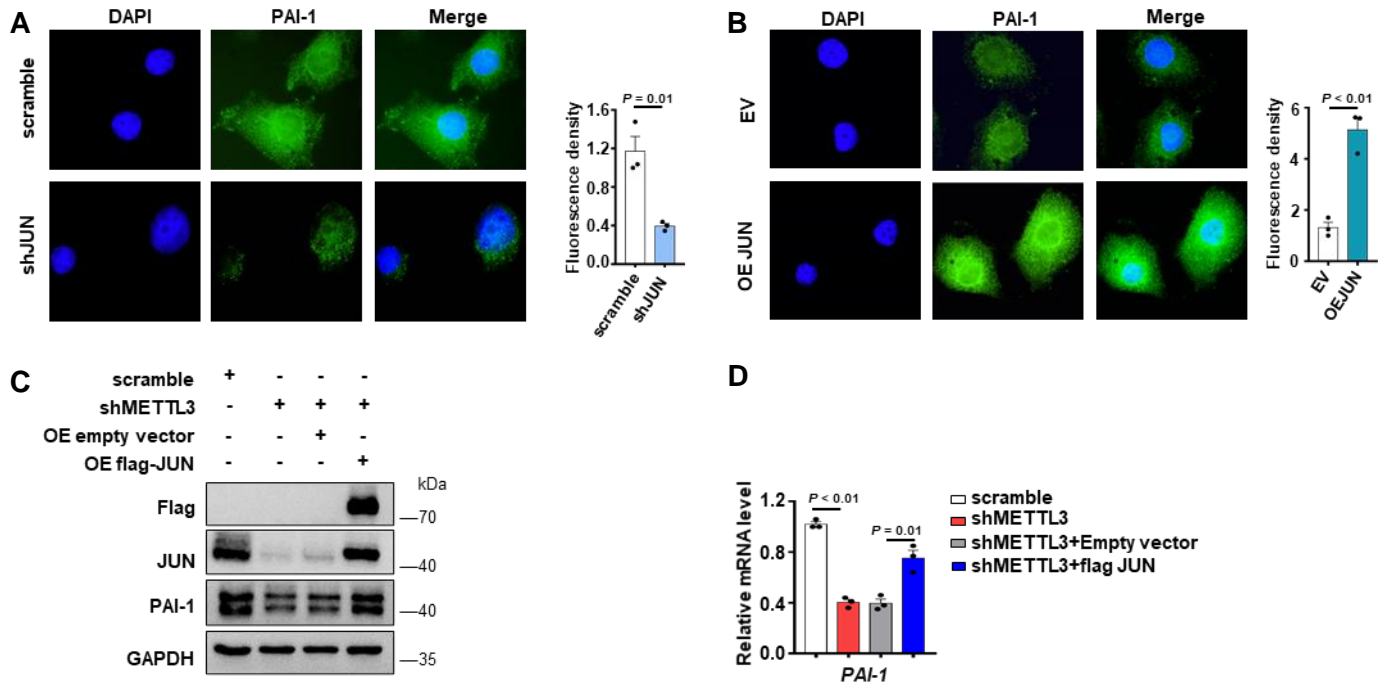

### Figure III. JUN rescues PAI-1 expression in METTL3 knockdown HUVECs.

(A-B) Immunofluorescence measured the protein of PAI-1 in shJUN and OE JUN HUVECs respectively (n=3, data are mean ± SEM). (C-D) Western blot and qPCR were conducted to detect the protein (A) and mRNA (B) level of PAI-1 in HUVECs after METTL3 or JUN intervention (n=3, data are mean ± SEM), OE: overexpression.

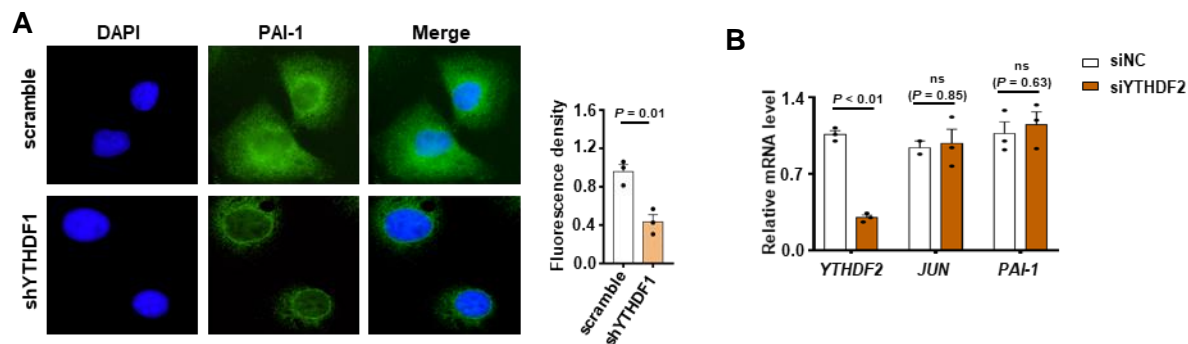

### Figure IV. YTHDF2 has little effect on the expression of JUN and PAI-1 mRNA abundance.

(A). Immunofluorescence measured the protein of PAI-1 in shYTHDF1 HUVECs (n=3, data are mean ± SEM). (B) PCR detected the mRNA level of *JUN* and *PAI-1* in HUVECs after YTHDF2 knockdown (n=3, data are mean ± SEM).

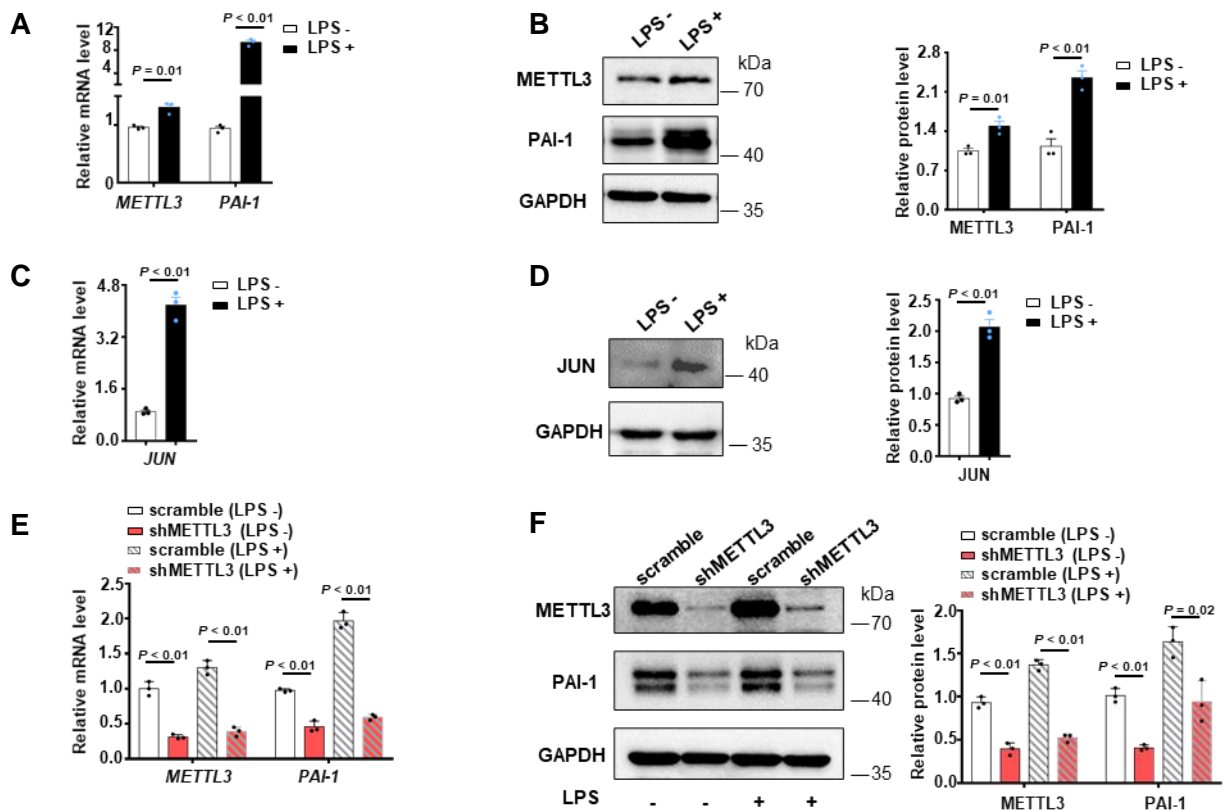

**Figure 5. METTL3/JUN/PAI-1 axis are up-regulated in LPS-treated HUVECs.**

(A, B) qPCR (A) and western blot (B) showed the increased METTL3 and PAI-1 expression upon LPS stimulation in HUVECs ( $n=3$ , data are mean  $\pm$  SEM). (C, D) qPCR (C) and western blot (D) analysis of JUN in LPS-treated HUVECs ( $n=3$ , data are mean  $\pm$  SEM). (E, F) qPCR (E) and western blot (F) measured the expression of METTL3 and PAI-1 in LPS challenged shMETTL3 HUVECs ( $n=3$ , data are mean  $\pm$  SEM).

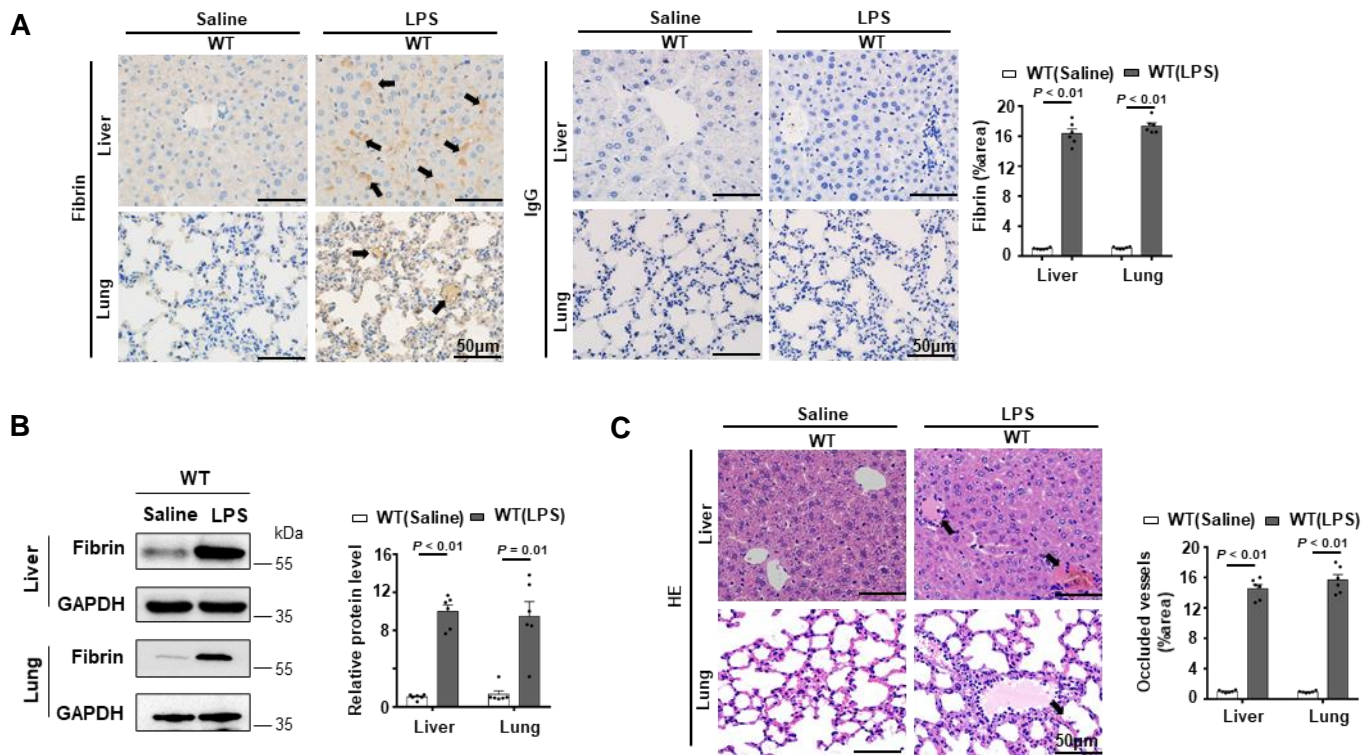



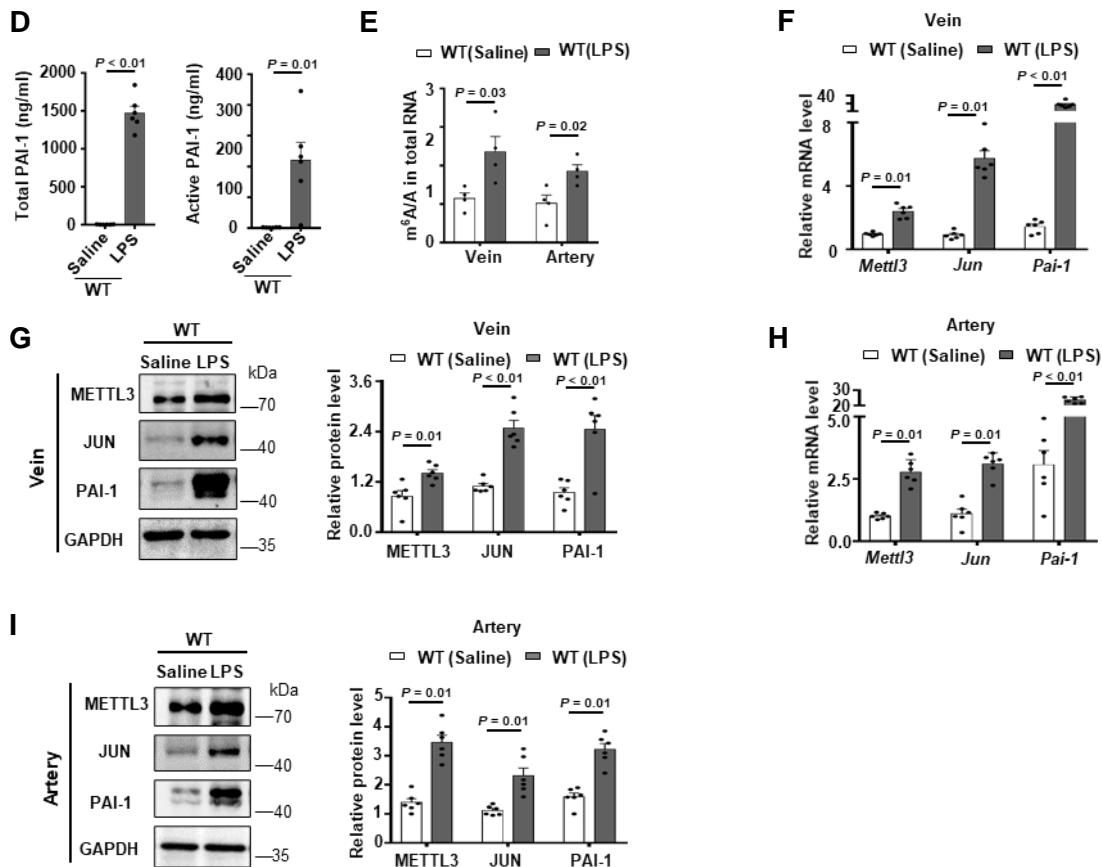

**Figure VI. METTL3/m<sup>6</sup>A/JUN/PAI-1 axis are up-regulated in endotoxin-treated WT mice.**

(A-B) Immunohistochemistry (A) and western blot (B) were used to detect fibrin in livers and lungs of LPS-treated mice (n=6, 3 males and 3 females) and saline-treated mice (n=6, 3 males and 3 females). Data are mean ± SEM, the black arrow indicates fibrin. (C) HE staining was used to detect thrombus in livers and lungs of LPS-treated mice (n=6, 3 males and 3 females) and saline-treated mice (n=6, 3 males and 3 females). Data are mean ± SEM, the black arrow indicates thrombus. (D) The levels of total PAI-1 and active PAI-1 in plasma of LPS challenged mice (n=6, 3 males and 3 females) and saline challenged mice (n=6, 3 males and 3 females) were detected by ELISA, data are mean ± SEM. (E) Overall m<sup>6</sup>A levels were qualitative using an antibody-mediated m<sup>6</sup>A capture assay in the vein and artery of LPS-treated mice (n=4, 3 males and 1 females) and saline-treated mice (n=4, 3 males and 1 females), data are mean ± SEM. (F-G) qPCR (F) and western blot (G) analysis of METTL3, JUN and PAI-1 in the vein of saline- treated mice (n=6, 3 males and 3 females) and LPS-treated mice (n=6, 3 males and 3 females), data are mean ± SEM. (H-I) qPCR (H) and western blot (I) analysis of METTL3, JUN and PAI-1 in the artery of saline- treated mice (n=6, 3 males and 3 females) and LPS-treated mice (n=6, 3 males and 3 females), data are median ± SD.

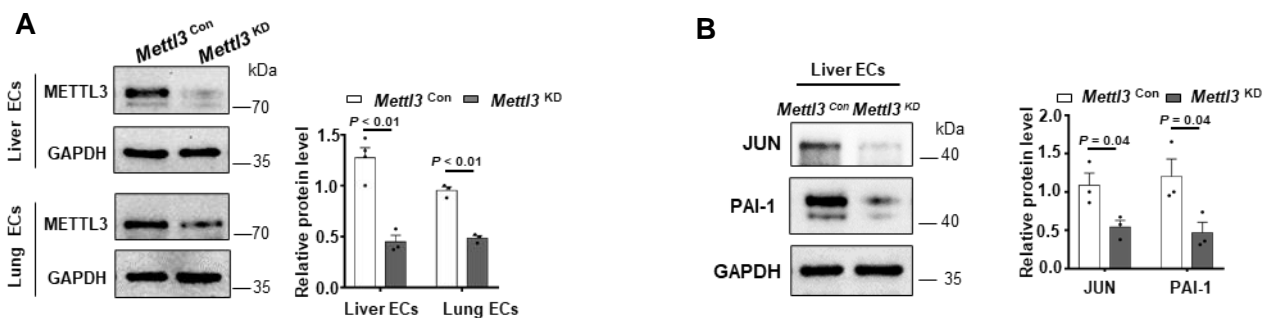

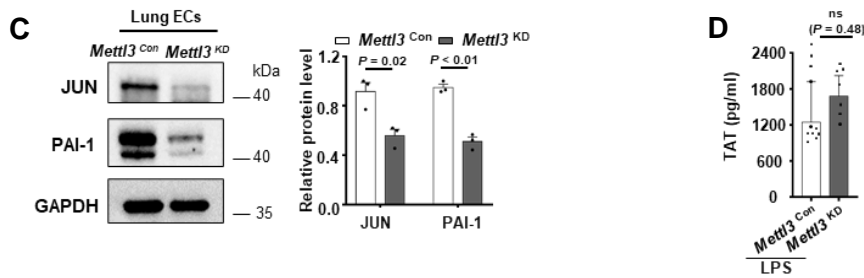

**Figure VII.** The protein expression of JUN and PAI-1 are down-regulated in the vascular endothelial cells of *Mettl3<sup>KD</sup>* mice.

(A) Western blot analysis of METTL3 in livers and lungs vascular endothelial cells of *Mettl3<sup>Con</sup>* mice (n=3, 2 males and 1 females) and *Mettl3<sup>KD</sup>* mice (n=3, 2 males and 1 females), data are mean  $\pm$  SEM. (B-C) Western blot showed the protein expression of JUN/PAI-1 in livers (B) and lungs (C) vascular endothelial cells of *Mettl3<sup>Con</sup>* mice (n=3, 2 males and 1 females) and *Mettl3<sup>KD</sup>* mice (n=3, 2 males and 1 females), data are mean  $\pm$  SEM. (D) ELISA showed the levels TAT in plasma of LPS-treated *Mettl3<sup>Con</sup>* mice (n=11, 6 males and 5 females) and *Mettl3<sup>KD</sup>* mice (n=7, 4 males and 3 females), data are median  $\pm$  SD.

**Table I . Differentially Expressed Genes in shMETTL3 HUVECs.**

Genes differentially expressed in shMETTL3 HUVECs are listed as follows with adjusted *P*-value < 0.05 and fold change > 2.

**Down-regulated genes in shMETTL3 HUVECs:**

| Gene name        | shMETTL3 (read count) | scramble (read count) | log <sub>2</sub> FoldChange | <i>p</i> -value | padj      |
|------------------|-----------------------|-----------------------|-----------------------------|-----------------|-----------|
| SERPINE1 (PAI-1) | 2134.936347           | 5802.243931           | -1.442396683                | 5.41E-104       | 3.78E-100 |
| HMOX1            | 1535.131598           | 4266.740026           | -1.474732995                | 2.63E-98        | 1.22E-94  |
| OSMR             | 3521.340596           | 9290.378909           | -1.399638383                | 7.96E-96        | 2.78E-92  |
| LAMC2            | 3226.799314           | 8074.003894           | -1.323185018                | 2.23E-95        | 6.23E-92  |
| EMP1             | 748.7684028           | 2370.631854           | -1.662693698                | 2.42E-85        | 4.83E-82  |
| SERPINE2         | 943.1093203           | 2753.411255           | -1.545680421                | 5.44E-83        | 9.51E-80  |
| DEGS1            | 677.6902426           | 2009.673539           | -1.56836139                 | 5.44E-72        | 6.90E-69  |
| CALD1            | 1301.875567           | 3816.927516           | -1.551764152                | 1.54E-71        | 1.79E-68  |
| PPP1R3B          | 549.0898086           | 1556.997663           | -1.503745453                | 1.84E-61        | 1.71E-58  |
| PERP             | 996.1074932           | 2563.386185           | -1.36360799                 | 3.67E-61        | 3.20E-58  |
| UPP1             | 2520.355879           | 6318.642257           | -1.325966534                | 8.44E-59        | 6.93E-56  |
| POFUT1           | 1493.022531           | 3225.010954           | -1.111056525                | 1.69E-55        | 1.18E-52  |
| IFI6             | 730.3399096           | 2273.844143           | -1.638510373                | 3.20E-55        | 2.13E-52  |
| TPM4             | 9876.498498           | 19885.43355           | -1.009631425                | 1.51E-51        | 9.58E-49  |
| ITGA6            | 2201.164647           | 4754.502909           | -1.11102047                 | 3.07E-51        | 1.86E-48  |
| SLC7A11          | 379.3150902           | 1080.615506           | -1.510383303                | 7.07E-48        | 3.66E-45  |
| OAS2             | 110.4986958           | 556.2057697           | -2.331600676                | 1.26E-47        | 6.05E-45  |
| LHFPL2           | 1093.824939           | 2351.841137           | -1.104389545                | 1.60E-47        | 7.45E-45  |
| NPTX1            | 937.5610834           | 2257.787793           | -1.268008643                | 6.74E-46        | 2.94E-43  |
| PSG4             | 320.4119154           | 1150.313537           | -1.84383927                 | 1.89E-45        | 7.99E-43  |
| LAMC1            | 3616.437565           | 7429.36971            | -1.038672784                | 8.06E-44        | 3.22E-41  |
| TFPI             | 543.0266906           | 1291.201795           | -1.249649262                | 1.33E-43        | 5.15E-41  |
| EPHB2            | 172.5804751           | 582.3497621           | -1.754695363                | 8.63E-43        | 3.17E-40  |
| CBFB             | 1330.144271           | 2777.984549           | -1.062422116                | 2.72E-42        | 9.74E-40  |
| MME              | 940.2817606           | 2033.455151           | -1.112712424                | 1.67E-41        | 5.82E-39  |
| SYPL1            | 1185.383211           | 2546.163884           | -1.102940521                | 4.02E-41        | 1.34E-38  |
| ASPH             | 1270.170681           | 2656.165523           | -1.06432509                 | 5.20E-41        | 1.69E-38  |
| MSANTD3          | 741.0212424           | 1675.888219           | -1.177304592                | 3.47E-40        | 1.10E-37  |

|             |             |             |              |          |          |
|-------------|-------------|-------------|--------------|----------|----------|
| SLFN5       | 596.631052  | 1401.751582 | -1.232295417 | 3.93E-40 | 1.22E-37 |
| ITGA2       | 1186.980023 | 2897.470013 | -1.287441633 | 5.35E-40 | 1.62E-37 |
| MAP1B       | 917.2474988 | 1947.832848 | -1.086500127 | 7.70E-40 | 2.29E-37 |
| UGT8        | 268.8376445 | 743.579587  | -1.467658527 | 3.53E-39 | 1.03E-36 |
| CXCL6       | 157.3360181 | 503.510383  | -1.678087114 | 2.53E-36 | 6.09E-34 |
| B4GALT6     | 165.8879426 | 524.6919741 | -1.66100258  | 6.07E-36 | 1.44E-33 |
| SLC37A2     | 95.05161792 | 376.0382658 | -1.984294202 | 6.35E-36 | 1.48E-33 |
| NIPAL4      | 105.9902982 | 446.2756263 | -2.074334168 | 1.92E-35 | 4.32E-33 |
| TES         | 586.6014163 | 1367.120081 | -1.220590193 | 1.40E-34 | 2.96E-32 |
| RAB29       | 718.5749872 | 1482.622582 | -1.045008896 | 3.71E-34 | 7.51E-32 |
| MX2         | 17.46441309 | 186.7961912 | -3.417603812 | 4.19E-34 | 8.36E-32 |
| LYN         | 444.7526603 | 1008.67756  | -1.181373847 | 1.14E-33 | 2.20E-31 |
| SNX10       | 241.0245572 | 674.2870451 | -1.483985416 | 1.73E-33 | 3.26E-31 |
| CFL2        | 456.1202564 | 1097.024992 | -1.266165892 | 5.56E-31 | 9.36E-29 |
| SPHK1       | 724.81477   | 1531.625794 | -1.079318053 | 6.83E-31 | 1.12E-28 |
| PKN2        | 1163.349133 | 2486.596073 | -1.095844281 | 1.30E-30 | 2.07E-28 |
| IFI16       | 151.0071967 | 471.3317361 | -1.64191704  | 1.80E-30 | 2.83E-28 |
| STC2        | 687.919072  | 1635.067569 | -1.249143015 | 3.55E-30 | 5.51E-28 |
| 4-Mar       | 291.4073631 | 741.2622127 | -1.346976343 | 8.36E-30 | 1.27E-27 |
| C1S         | 82.21396951 | 330.6966527 | -2.008736217 | 3.88E-29 | 5.71E-27 |
| BNIP2       | 759.3085305 | 1543.46119  | -1.023412723 | 2.65E-28 | 3.73E-26 |
| METTL3      | 514.8106776 | 1073.922181 | -1.060683035 | 4.66E-27 | 6.32E-25 |
| TMEM19      | 301.7594409 | 702.7871063 | -1.219547217 | 7.28E-27 | 9.78E-25 |
| NRP1        | 92.10234514 | 316.9417389 | -1.783305569 | 5.26E-26 | 6.87E-24 |
| TXNDC5      | 204.28686   | 534.3158079 | -1.387231356 | 3.77E-25 | 4.58E-23 |
| CTSL        | 679.9083094 | 1406.352549 | -1.048473765 | 1.26E-24 | 1.43E-22 |
| PLPP3       | 405.7026589 | 816.9771151 | -1.009836274 | 1.51E-23 | 1.62E-21 |
| OAS1        | 110.4940449 | 327.0760166 | -1.565688804 | 1.56E-23 | 1.66E-21 |
| FSTL3       | 391.7904975 | 870.7809489 | -1.152403428 | 4.01E-23 | 4.09E-21 |
| CYBRD1      | 182.3868291 | 447.0643894 | -1.293223562 | 3.30E-22 | 3.14E-20 |
| PXDC1       | 367.0714305 | 754.2766848 | -1.038862518 | 9.32E-22 | 8.46E-20 |
| GRB10       | 415.170307  | 855.1334106 | -1.04249791  | 2.63E-21 | 2.31E-19 |
| GLIPR1      | 24.38466065 | 145.4522429 | -2.575883603 | 4.08E-21 | 3.52E-19 |
| GBP3        | 229.2218116 | 511.1018014 | -1.15678928  | 5.55E-21 | 4.70E-19 |
| AL590004.3  | 12.19717647 | 111.1989645 | -3.188060601 | 5.77E-21 | 4.86E-19 |
| ACP7        | 146.1364243 | 361.5202665 | -1.306768935 | 2.10E-20 | 1.71E-18 |
| LGALS3BP    | 119.5117548 | 334.3153701 | -1.484415035 | 3.10E-20 | 2.46E-18 |
| RRAGD       | 255.6345295 | 551.7140017 | -1.109677743 | 2.40E-19 | 1.77E-17 |
| PMP22       | 321.9798628 | 651.0563809 | -1.015850008 | 3.90E-19 | 2.84E-17 |
| ANK2        | 167.5661865 | 410.6795902 | -1.293144581 | 3.95E-18 | 2.64E-16 |
| AL365181.3  | 135.9812867 | 331.697368  | -1.286610303 | 3.13E-17 | 1.93E-15 |
| IFI44       | 246.6965851 | 525.0577057 | -1.089837364 | 4.48E-17 | 2.70E-15 |
| EDEM3       | 399.2925129 | 807.8098256 | -1.016467872 | 1.31E-16 | 7.40E-15 |
| IFI44L      | 12.86611215 | 88.55149286 | -2.783269944 | 6.59E-16 | 3.51E-14 |
| MANEA       | 308.5641068 | 639.6895928 | -1.051696292 | 3.02E-15 | 1.53E-13 |
| GPR137B     | 126.9688409 | 288.9934771 | -1.186293318 | 3.02E-14 | 1.35E-12 |
| PDCD1LG2    | 5.285339902 | 63.9185983  | -3.597899371 | 4.06E-14 | 1.78E-12 |
| ADGRF4      | 80.81961612 | 210.5001269 | -1.381174445 | 5.01E-14 | 2.17E-12 |
| MEGF6       | 50.84124408 | 162.4161951 | -1.675869428 | 6.39E-14 | 2.71E-12 |
| TM4SF19-AS1 | 117.7931826 | 263.8889013 | -1.163822552 | 2.60E-13 | 1.03E-11 |

|            |             |             |              |          |            |
|------------|-------------|-------------|--------------|----------|------------|
| SLC35G1    | 224.565163  | 452.2870528 | -1.009879458 | 2.77E-13 | 1.09E-11   |
| GJB3       | 141.2764578 | 310.809566  | -1.137904647 | 3.00E-13 | 1.18E-11   |
| IFI27      | 14.54577624 | 86.63112072 | -2.576058265 | 3.15E-13 | 1.23E-11   |
| TRIM22     | 10.23729806 | 70.60210218 | -2.787049419 | 4.06E-13 | 1.56E-11   |
| AMPD3      | 45.17506452 | 141.6434273 | -1.648304436 | 5.24E-13 | 1.98E-11   |
| GREB1      | 14.19287103 | 79.31603346 | -2.482884647 | 6.79E-13 | 2.55E-11   |
| DNER       | 88.76170456 | 219.4257398 | -1.305631221 | 7.68E-13 | 2.87E-11   |
| KATNBL1    | 175.1045972 | 355.067888  | -1.019815155 | 7.78E-13 | 2.90E-11   |
| LONRF1     | 81.1919059  | 206.3490006 | -1.345839648 | 1.40E-12 | 5.03E-11   |
| ROBO4      | 32.01620541 | 121.8272319 | -1.927875156 | 3.54E-12 | 1.23E-10   |
| HBEGF      | 103.8807486 | 233.5716198 | -1.168769332 | 4.01E-12 | 1.38E-10   |
| LURAP1L    | 31.33855218 | 109.3680045 | -1.802940963 | 7.47E-12 | 2.50E-10   |
| GBP1       | 27.71162616 | 99.29226743 | -1.841247194 | 1.82E-11 | 5.74E-10   |
| SEL1L3     | 140.2670107 | 298.254023  | -1.088882642 | 2.36E-11 | 7.36E-10   |
| PTPRO      | 24.71729038 | 100.4768415 | -2.02300527  | 2.62E-11 | 8.11E-10   |
| AC003092.1 | 46.18331418 | 129.6565449 | -1.489145955 | 7.21E-11 | 2.11E-09   |
| LAMA1      | 68.95011188 | 166.925628  | -1.275653504 | 2.05E-10 | 5.71E-09   |
| GSDMA      | 28.05439363 | 95.03241362 | -1.760328969 | 3.16E-10 | 8.58E-09   |
| SH3TC2     | 58.07924885 | 153.4462415 | -1.402172389 | 3.21E-10 | 8.69E-09   |
| PLSCR4     | 57.70810149 | 146.9694404 | -1.348383464 | 4.83E-10 | 1.27E-08   |
| GBP2       | 20.45206462 | 80.57594802 | -1.97831594  | 7.79E-10 | 2.01E-08   |
| TMEM154    | 72.58425143 | 166.2506328 | -1.195770617 | 8.75E-10 | 2.23E-08   |
| GAL        | 75.93029496 | 180.7971744 | -1.251717634 | 1.65E-09 | 3.97E-08   |
| SPOCD1     | 1.649250887 | 39.72492665 | -4.589521326 | 1.79E-09 | 4.30E-08   |
| STEAP1     | 82.7981271  | 183.5510492 | -1.148584681 | 2.58E-09 | 6.04E-08   |
| CLGN       | 50.08571973 | 131.9089379 | -1.39649723  | 5.77E-09 | 1.29E-07   |
| FGF5       | 57.08573283 | 148.7049523 | -1.381233502 | 8.49E-09 | 1.87E-07   |
| BATF2      | 10.55881533 | 54.40468555 | -2.364985456 | 2.08E-08 | 4.35E-07   |
| AL391422.4 | 28.71372086 | 87.08182693 | -1.600532681 | 4.69E-08 | 9.27E-07   |
| AL356234.3 | 5.271219394 | 39.26466164 | -2.896185384 | 5.62E-08 | 1.09E-06   |
| PCSK1N     | 65.70171445 | 161.4620155 | -1.297309929 | 5.68E-08 | 1.10E-06   |
| BST2       | 6.929856007 | 49.54716275 | -2.838575937 | 9.36E-08 | 1.75E-06   |
| LRP3       | 54.82280204 | 137.8996624 | -1.330825064 | 3.10E-07 | 5.22E-06   |
| TRPM8      | 28.33730942 | 82.29964465 | -1.537453684 | 4.18E-07 | 6.88E-06   |
| TP53I11    | 58.73879881 | 127.0783036 | -1.113192673 | 9.51E-07 | 1.45E-05   |
| PTX3       | 60.65361422 | 131.3746659 | -1.114385337 | 1.01E-06 | 1.52E-05   |
| SUN3       | 9.886871609 | 42.61315101 | -2.107217525 | 1.72E-06 | 2.48E-05   |
| FAM78B     | 33.66147352 | 84.2291766  | -1.323800069 | 2.03E-06 | 2.87E-05   |
| CACNA2D1   | 58.10523384 | 124.2582457 | -1.097135435 | 2.18E-06 | 3.09E-05   |
| SAMD9      | 29.98182553 | 81.76105756 | -1.446104214 | 2.48E-06 | 3.44E-05   |
| ADRB2      | 44.25641157 | 104.9230868 | -1.246155802 | 2.55E-06 | 3.52E-05   |
| ALPK1      | 57.68699017 | 122.930293  | -1.091175306 | 2.56E-06 | 3.54E-05   |
| HTR1D      | 34.64351548 | 85.0881729  | -1.296000162 | 4.60E-06 | 5.95E-05   |
| IL15RA     | 23.75875466 | 64.29336721 | -1.436521695 | 6.06E-06 | 7.61E-05   |
| ACHE       | 45.85887272 | 98.98719628 | -1.110026172 | 6.35E-06 | 7.95E-05   |
| PLIN5      | 28.70327656 | 72.01083694 | -1.326894371 | 9.78E-06 | 0.00011624 |
| ITGB1-DT   | 50.78206057 | 109.2142054 | -1.104789744 | 1.79E-05 | 0.00020167 |
| AC006333.2 | 31.34125365 | 76.02217444 | -1.278182873 | 1.90E-05 | 0.00021223 |
| SATB1      | 8.58481641  | 36.00200031 | -2.068795133 | 2.10E-05 | 0.00023277 |
| IL1B       | 43.54661839 | 93.05688141 | -1.095232663 | 2.56E-05 | 0.00027622 |

|             |             |             |              |            |            |
|-------------|-------------|-------------|--------------|------------|------------|
| P4HA3       | 34.65139718 | 78.23673121 | -1.175510429 | 3.02E-05   | 0.00031819 |
| AL365203.2  | 26.09624197 | 68.41900796 | -1.390869749 | 3.82E-05   | 0.00039206 |
| AL365181.2  | 27.04636669 | 65.57525258 | -1.278002145 | 4.17E-05   | 0.00042281 |
| PLXNB3      | 36.9557698  | 79.34530666 | -1.102302252 | 5.19E-05   | 0.0005139  |
| FA2H        | 16.51136416 | 47.33326983 | -1.519985749 | 7.62E-05   | 0.00072002 |
| RAG1        | 27.03945972 | 64.05367879 | -1.243514075 | 7.68E-05   | 0.00072482 |
| MMP1        | 8.583089667 | 33.01015802 | -1.943667488 | 7.68E-05   | 0.00072482 |
| IGSF10      | 41.57757698 | 86.52232609 | -1.057914717 | 8.49E-05   | 0.00079045 |
| SAMD9L      | 42.52867644 | 87.55303974 | -1.041701156 | 0.00010037 | 0.00091148 |
| CEACAM19    | 29.36605728 | 68.03468024 | -1.211955254 | 0.00010125 | 0.00091829 |
| AC008429.1  | 8.891461158 | 33.30640128 | -1.904153608 | 0.0001016  | 0.00091969 |
| RGPD6       | 12.52236994 | 54.17275979 | -2.112937953 | 0.00010439 | 0.00094184 |
| TNFSF14     | 30.33105452 | 68.36318404 | -1.1717643   | 0.00011856 | 0.00105205 |
| FEZF1-AS1   | 12.87970337 | 39.68018704 | -1.623855635 | 0.00016134 | 0.00137658 |
| NCF2        | 21.77687404 | 53.01267784 | -1.283459825 | 0.00020764 | 0.00172114 |
| PRKCQ       | 35.96283811 | 75.44017544 | -1.068295645 | 0.00024999 | 0.00201826 |
| PRPS1P2     | 28.36006365 | 64.70557334 | -1.189507179 | 0.00025657 | 0.00206374 |
| S100A3      | 43.54503053 | 88.36862413 | -1.020794294 | 0.00027257 | 0.00217659 |
| MSRB2       | 29.01810958 | 62.3128561  | -1.102315314 | 0.00035875 | 0.00273953 |
| AC005077.4  | 16.18639341 | 42.33370187 | -1.387809407 | 0.00045376 | 0.00333106 |
| CEACAM1     | 27.6992324  | 60.96884021 | -1.138047114 | 0.00048353 | 0.00351831 |
| SERTAD4-AS1 | 37.57552083 | 76.00106527 | -1.01563427  | 0.0004843  | 0.00352123 |
| AC008894.3  | 18.1489733  | 44.60713696 | -1.297962934 | 0.00049726 | 0.00358728 |
| RP1         | 17.82572929 | 44.69522142 | -1.326244338 | 0.00050047 | 0.00360128 |
| PDE2A       | 16.82123968 | 42.98891569 | -1.353536994 | 0.0006437  | 0.0044552  |
| VSIR        | 32.3591956  | 70.73545597 | -1.128356595 | 0.00070756 | 0.0048254  |
| AC026461.3  | 13.86227461 | 38.39046957 | -1.469320385 | 0.00084796 | 0.00565858 |
| GOLGA7B     | 9.87793133  | 31.98375941 | -1.693882299 | 0.00090079 | 0.00594021 |
| AXIN2       | 17.15927236 | 41.34640012 | -1.268723574 | 0.00091429 | 0.00601221 |
| HNF4G       | 31.66396837 | 63.59082542 | -1.006206125 | 0.00097986 | 0.00637134 |
| MTX1P1      | 56.1322935  | 174.6042011 | -1.637221774 | 0.00103211 | 0.00666459 |
| CDKN1C      | 17.81041132 | 41.65412668 | -1.225594414 | 0.00119572 | 0.00758431 |
| TMEM158     | 122.2307787 | 313.8089166 | -1.360337703 | 0.0012337  | 0.00779334 |
| KLF9        | 11.52943825 | 32.71623825 | -1.50311033  | 0.00136364 | 0.00847615 |
| AC002401.4  | 16.8469181  | 41.37859359 | -1.29674998  | 0.00148939 | 0.0091439  |
| CXCR6       | 12.52732745 | 33.29982981 | -1.410226138 | 0.00175055 | 0.01046936 |
| PSG1        | 17.16370058 | 41.28267704 | -1.26681967  | 0.00185829 | 0.01095139 |
| SHISA3      | 19.12260426 | 42.93634398 | -1.166992491 | 0.00198087 | 0.01155189 |
| TBILA       | 23.06901423 | 48.66805884 | -1.076260613 | 0.00211812 | 0.01221963 |
| AL590666.2  | 27.05252166 | 56.7593017  | -1.068496997 | 0.00220455 | 0.01266599 |
| AC017100.1  | 12.18110649 | 34.63827002 | -1.506674104 | 0.00224157 | 0.01284168 |
| AC005865.2  | 10.87506852 | 29.97603374 | -1.462263847 | 0.00261944 | 0.01468715 |
| NIPAL2      | 17.13674086 | 39.00426304 | -1.185720026 | 0.00278162 | 0.01547225 |
| BCAN        | 25.73935399 | 52.31079991 | -1.023357093 | 0.0028576  | 0.01585071 |
| GLIDR       | 22.06324332 | 47.92934047 | -1.118639442 | 0.00302337 | 0.01659232 |
| BTBD19      | 16.51999788 | 37.9729526  | -1.201857354 | 0.00356669 | 0.01896308 |
| ACSM4       | 14.17680106 | 31.98017529 | -1.173369638 | 0.00615231 | 0.02962749 |
| VEPH1       | 16.48387516 | 35.6547779  | -1.112635029 | 0.00625116 | 0.02998283 |
| CYR1        | 20.78889985 | 41.64297531 | -1.002537462 | 0.00646302 | 0.0307367  |
| TMED6       | 11.21265576 | 26.98160311 | -1.266771509 | 0.00729656 | 0.03397036 |

|          |             |             |              |            |            |
|----------|-------------|-------------|--------------|------------|------------|
| TMEM151B | 11.90584968 | 29.69751332 | -1.319728733 | 0.00783122 | 0.03589716 |
| GPR17    | 15.16920347 | 32.97205694 | -1.120063873 | 0.00883295 | 0.03964325 |
| ENPEP    | 14.20256332 | 31.99199051 | -1.17228171  | 0.00885    | 0.03968154 |
| FAM71F2  | 15.52737275 | 35.01071544 | -1.173595011 | 0.00933873 | 0.04146027 |
| MSR1     | 18.80454048 | 38.01437295 | -1.015229743 | 0.01058561 | 0.04601592 |

**UP regulated genes in shMETTL3 HUVECs:**

| Gene Name  | shMETTL3<br>(read count) | scramble<br>(read count) | log <sub>2</sub> FoldChange | p-value   | padj      |
|------------|--------------------------|--------------------------|-----------------------------|-----------|-----------|
| TNC        | 842.7203087              | 82.9456316               | 3.344545612                 | 4.40E-126 | 6.15E-122 |
| SAA1       | 759.6426617              | 92.8721495               | 3.031224454                 | 1.10E-92  | 2.56E-89  |
| PEG10      | 4216.268574              | 1551.46535               | 1.44240732                  | 1.56E-80  | 2.42E-77  |
| ABCA12     | 441.3329223              | 36.3478279               | 3.602668163                 | 1.49E-77  | 2.08E-74  |
| SRGAP3     | 421.6145475              | 48.6493402               | 3.115382402                 | 3.58E-69  | 3.84E-66  |
| CBX5       | 2912.860079              | 1070.48986               | 1.444192574                 | 1.64E-65  | 1.64E-62  |
| NPNT       | 1198.493163              | 401.816239               | 1.576600455                 | 7.67E-57  | 5.95E-54  |
| SLC48A1    | 5093.120756              | 2099.8067                | 1.278331765                 | 9.35E-57  | 6.88E-54  |
| TNFAIP2    | 13403.89179              | 5931.48513               | 1.176217746                 | 2.04E-50  | 1.18E-47  |
| ADORA1     | 856.6729531              | 271.275611               | 1.658966544                 | 1.02E-49  | 5.69E-47  |
| KLHDC3     | 1771.2536                | 771.362962               | 1.19925186                  | 2.36E-49  | 1.27E-46  |
| C1orf216   | 1350.144385              | 537.629251               | 1.328494809                 | 1.08E-47  | 5.38E-45  |
| RAPGEF3    | 1481.56854               | 592.633198               | 1.322185702                 | 7.76E-43  | 2.93E-40  |
| ELF3       | 925.7554738              | 359.497272               | 1.364557725                 | 6.69E-39  | 1.91E-36  |
| COL12A1    | 1804.803731              | 788.330292               | 1.194847731                 | 6.08E-38  | 1.63E-35  |
| CCDC198    | 666.1882985              | 219.104003               | 1.604005742                 | 4.69E-37  | 1.24E-34  |
| CBX1       | 2952.550479              | 1439.59941               | 1.036230607                 | 5.85E-37  | 1.51E-34  |
| VCAN       | 1303.168344              | 550.133142               | 1.243972998                 | 1.79E-36  | 4.38E-34  |
| PTAFR      | 627.5612704              | 226.316739               | 1.471498059                 | 4.90E-35  | 1.09E-32  |
| KLHL14     | 196.311518               | 28.3423461               | 2.792654123                 | 1.93E-32  | 3.50E-30  |
| NEURL1B    | 688.0297538              | 258.319813               | 1.413368891                 | 2.15E-32  | 3.86E-30  |
| ALPK2      | 416.9434168              | 131.96682                | 1.659740013                 | 5.63E-31  | 9.36E-29  |
| BX571818.1 | 1074.636076              | 438.757875               | 1.292035769                 | 7.22E-31  | 1.17E-28  |
| MPP3       | 832.2695601              | 316.020018               | 1.397256885                 | 4.53E-30  | 6.96E-28  |
| MYLK       | 303.5754077              | 82.9393921               | 1.871564064                 | 2.41E-28  | 3.43E-26  |
| WNT10A     | 164.3433837              | 29.3421269               | 2.486082556                 | 7.83E-24  | 8.61E-22  |
| IKBKE      | 860.8534558              | 426.164705               | 1.014274957                 | 3.71E-23  | 3.81E-21  |
| RNF152     | 224.0962255              | 54.6857943               | 2.035222975                 | 5.29E-23  | 5.31E-21  |
| CGN        | 795.2040179              | 372.666539               | 1.09315939                  | 6.80E-23  | 6.74E-21  |
| FAT4       | 802.7852145              | 390.707598               | 1.038792028                 | 1.13E-22  | 1.11E-20  |
| ARL1       | 995.9464581              | 454.029591               | 1.132996895                 | 1.19E-22  | 1.16E-20  |
| SH3D21     | 434.2461765              | 176.23105                | 1.300825727                 | 7.41E-22  | 6.80E-20  |
| SERPINA6   | 154.811144               | 25.3610583               | 2.610795678                 | 2.78E-21  | 2.43E-19  |
| B3GALT5    | 395.8773945              | 155.354603               | 1.349724813                 | 1.42E-20  | 1.16E-18  |
| DENND2A    | 519.4456254              | 227.355881               | 1.192118636                 | 2.91E-20  | 2.32E-18  |
| CDH1       | 153.4289616              | 32.0330789               | 2.260952003                 | 5.13E-20  | 4.00E-18  |
| MAP3K12    | 918.0995819              | 425.265292               | 1.110507688                 | 8.16E-20  | 6.26E-18  |
| NRG1       | 686.749512               | 325.363477               | 1.077919647                 | 1.63E-19  | 1.23E-17  |
| H19        | 244.383157               | 46.0608762               | 2.408230075                 | 1.68E-19  | 1.26E-17  |
| SAA2       | 104.5445879              | 11.9828992               | 3.124067447                 | 2.13E-19  | 1.59E-17  |
| KCNJ16     | 95.72086016              | 8.97207346               | 3.412344019                 | 1.07E-18  | 7.52E-17  |
| CSGALNACT1 | 218.0229698              | 70.0185106               | 1.639114632                 | 2.15E-18  | 1.47E-16  |

|          |             |            |             |          |           |
|----------|-------------|------------|-------------|----------|-----------|
| PAX2     | 341.9426594 | 132.018396 | 1.373117978 | 1.21E-17 | 7.85E-16  |
| WNT6     | 137.0581056 | 21.9921907 | 2.639461342 | 2.33E-17 | 1.45E-15  |
| ARMH4    | 556.5436928 | 265.562018 | 1.067403444 | 4.34E-17 | 2.63E-15  |
| ADAP1    | 328.0341794 | 122.018861 | 1.4268865   | 4.48E-17 | 2.70E-15  |
| SH3PXD2A | 311.1728342 | 126.651959 | 1.29687466  | 6.56E-17 | 3.83E-15  |
| GRB14    | 289.2401341 | 113.065641 | 1.355693671 | 1.60E-16 | 8.92E-15  |
| SYT8     | 110.8824046 | 22.3045643 | 2.312693069 | 7.20E-16 | 3.82E-14  |
| MT1F     | 766.3121674 | 359.43985  | 1.091894778 | 7.97E-16 | 4.20E-14  |
| TNFRSF19 | 357.1909366 | 161.967745 | 1.141119716 | 1.11E-15 | 5.78E-14  |
| THEG     | 163.615571  | 49.606373  | 1.721111338 | 6.16E-15 | 3.01E-13  |
| SYT11    | 229.9707355 | 88.7066197 | 1.374759269 | 7.34E-15 | 3.55E-13  |
| TRIB2    | 293.3186412 | 124.238199 | 1.239060012 | 9.29E-15 | 4.40E-13  |
| POU5F1   | 389.4959561 | 166.979263 | 1.221894064 | 3.88E-14 | 1.71E-12  |
| CXCL3    | 331.1293972 | 151.834857 | 1.124561422 | 9.45E-14 | 3.95E-12  |
| ITGB2    | 136.2876249 | 40.266434  | 1.75795529  | 3.04E-13 | 1.19E-11  |
| DHRS2    | 335.4443081 | 153.849885 | 1.124269462 | 4.11E-13 | 1.58E-11  |
| SLCO2B1  | 269.4858305 | 116.999314 | 1.203916132 | 4.28E-13 | 1.64E-11  |
| CBLN2    | 156.3636685 | 53.61074   | 1.543832563 | 1.16E-12 | 4.19E-11  |
| PRRT3    | 286.2044902 | 124.988401 | 1.195182566 | 1.64E-12 | 5.86E-11  |
| FER1L4   | 83.82408964 | 17.0235556 | 2.30112929  | 2.44E-12 | 8.57E-11  |
| SLC22A3  | 159.5967479 | 53.3332154 | 1.581643825 | 3.22E-12 | 1.13E-10  |
| VCAM1    | 52.10049231 | 4.00669053 | 3.703115917 | 8.32E-12 | 2.75E-10  |
| NOVA2    | 308.6102783 | 147.727541 | 1.063049082 | 3.11E-11 | 9.57E-10  |
| DNAJC6   | 352.9718324 | 175.616992 | 1.007141965 | 6.01E-11 | 1.78E-09  |
| KIF12    | 284.5174449 | 134.350046 | 1.082583991 | 7.11E-11 | 2.09E-09  |
| MAL2     | 241.7700276 | 112.551808 | 1.102707561 | 7.38E-11 | 2.15E-09  |
| TMEM243  | 293.8341457 | 144.845618 | 1.020212382 | 1.63E-10 | 4.59E-09  |
| PGM5     | 114.8362509 | 38.2731119 | 1.58420263  | 2.97E-10 | 8.08E-09  |
| AKAP5    | 168.5150299 | 70.3308841 | 1.260919006 | 1.20E-09 | 2.97E-08  |
| PANK1    | 133.903209  | 51.3086956 | 1.383888755 | 1.25E-09 | 3.08E-08  |
| LYSMD2   | 147.4606206 | 59.3138456 | 1.313878927 | 2.35E-09 | 5.54E-08  |
| PTPN13   | 86.10022124 | 24.7065084 | 1.802524005 | 2.50E-09 | 5.87E-08  |
| ISM1     | 79.41565429 | 21.3652543 | 1.895722407 | 1.30E-08 | 2.80E-07  |
| CP       | 39.26351207 | 3.65754363 | 3.421976971 | 1.39E-08 | 2.98E-07  |
| TMEFF2   | 57.39176445 | 13.3393942 | 2.105843485 | 1.75E-08 | 3.69E-07  |
| KCNIP3   | 114.4315984 | 40.6848797 | 1.49248073  | 1.79E-08 | 3.78E-07  |
| PLLP     | 178.1664437 | 84.9732058 | 1.068097638 | 5.25E-08 | 1.03E-06  |
| RAB19    | 175.9700776 | 80.6364189 | 1.125576703 | 1.16E-07 | 2.11E-06  |
| CRISPLD2 | 62.04557269 | 16.6671734 | 1.896439092 | 1.21E-07 | 2.20E-06  |
| RAB39B   | 78.14078153 | 22.9213451 | 1.767509971 | 1.29E-07 | 2.34E-06  |
| PSORS1C3 | 119.7797142 | 50.9677798 | 1.232440028 | 1.47E-07 | 2.62E-06  |
| KLHDC7A  | 38.26375724 | 6.32121405 | 2.596261963 | 2.32E-07 | 4.01E-06  |
| SEMA5A   | 140.1780821 | 64.3239681 | 1.123987391 | 3.20E-07 | 5.35E-06  |
| RAB17    | 109.9068793 | 41.5910004 | 1.4010486   | 1.24E-06 | 1.84E-05  |
| PIANP    | 125.4279582 | 60.9675796 | 1.040421044 | 3.62E-06 | 4.80E-05  |
| SOCS1    | 149.4742245 | 72.402068  | 1.046343087 | 4.18E-06 | 5.48E-05  |
| FZD10-DT | 93.76518725 | 40.9647278 | 1.194066424 | 8.40E-06 | 0.0001014 |
| SERPINB9 | 94.09826243 | 43.0033863 | 1.12965721  | 2.05E-05 | 0.0002282 |
| CNIH2    | 46.87845757 | 14.351986  | 1.708576563 | 2.28E-05 | 0.0002503 |
| CRB3     | 116.1516746 | 57.9560229 | 1.00264937  | 2.74E-05 | 0.000292  |

|            |             |            |             |           |           |
|------------|-------------|------------|-------------|-----------|-----------|
| AQP3       | 49.79146874 | 16.6885474 | 1.57833474  | 2.87E-05  | 0.0003044 |
| HOXA3      | 135.341344  | 64.6355437 | 1.065978182 | 3.77E-05  | 0.0003886 |
| SLC47A2    | 46.18827169 | 14.9493844 | 1.625251712 | 4.28E-05  | 0.0004333 |
| DLL1       | 80.20384787 | 36.0144794 | 1.155349088 | 4.74E-05  | 0.0004744 |
| RASD2      | 58.45340426 | 20.6058258 | 1.502320184 | 5.12E-05  | 0.0005079 |
| C6orf58    | 40.55949615 | 11.9776555 | 1.758730268 | 6.61E-05  | 0.0006414 |
| AC091806.1 | 31.68973064 | 7.9775364  | 1.987809478 | 7.31E-05  | 0.0006955 |
| SGK2       | 50.21759412 | 16.9762276 | 1.563531548 | 7.80E-05  | 0.0007345 |
| SLC4A8     | 40.25232211 | 12.6351928 | 1.669998891 | 8.26E-05  | 0.0007724 |
| FRMPD3     | 51.14549392 | 18.9754574 | 1.429726363 | 8.78E-05  | 0.0008138 |
| AP001527.2 | 72.89434966 | 34.319657  | 1.086777146 | 0.0001419 | 0.0012238 |
| CYS1       | 81.16703453 | 38.388478  | 1.081160214 | 0.0001501 | 0.0012867 |
| AC092868.1 | 30.66616301 | 8.65578388 | 1.824340634 | 0.000208  | 0.0017229 |
| SAMD14     | 66.34533331 | 30.3373278 | 1.12896865  | 0.0002248 | 0.0018448 |
| ZNF608     | 79.20303447 | 38.6991919 | 1.033786931 | 0.0002577 | 0.0020695 |
| PRRT2      | 55.09159732 | 23.2767315 | 1.241588281 | 0.0002734 | 0.0021809 |
| PTP4A3     | 71.20919878 | 34.6359465 | 1.039692952 | 0.0003755 | 0.002844  |
| FAM57B     | 53.79653294 | 23.65774   | 1.184990141 | 0.0004878 | 0.003543  |
| AC004890.2 | 69.92644432 | 34.6839383 | 1.012117767 | 0.0004991 | 0.0035934 |
| C9orf84    | 40.54626653 | 15.6545816 | 1.372942628 | 0.0007733 | 0.0052176 |
| PREX2      | 40.2557756  | 16.0089722 | 1.330820371 | 0.0008061 | 0.0054053 |
| KDF1       | 63.06785902 | 30.0029834 | 1.071720203 | 0.0010696 | 0.0068686 |
| VGLL3      | 59.64642313 | 27.3201954 | 1.126710211 | 0.0011246 | 0.0071757 |
| RHBDL1     | 39.27320436 | 16.0083084 | 1.29511161  | 0.001538  | 0.0093807 |
| RHEX       | 40.95512448 | 16.9821353 | 1.269143604 | 0.0016342 | 0.0098729 |
| ITGB2-AS1  | 47.78104054 | 21.0013049 | 1.186528441 | 0.0020041 | 0.0116628 |
| DNAH3      | 33.64810503 | 13.2979738 | 1.337770136 | 0.0023956 | 0.0135516 |
| MIR4664    | 50.53805282 | 23.2947863 | 1.116229216 | 0.0029565 | 0.0163149 |
| AL157829.1 | 34.6170012  | 14.6541369 | 1.240048008 | 0.0031315 | 0.0170918 |
| HOXA-AS2   | 28.03952111 | 10.6553455 | 1.395372867 | 0.0033509 | 0.0180286 |
| ACTL10     | 45.19157994 | 20.5989224 | 1.131822143 | 0.0036969 | 0.0195067 |
| 4-Sep      | 29.0225378  | 11.3398325 | 1.356483085 | 0.0036998 | 0.0195119 |
| AP003392.4 | 46.21425667 | 22.981484  | 1.007306141 | 0.0042233 | 0.0218148 |
| NFATC4     | 41.92184847 | 20.0156628 | 1.067022768 | 0.0043915 | 0.0225002 |
| BCL11B     | 28.35780762 | 10.6944424 | 1.408921676 | 0.0046042 | 0.0233298 |
| CDHR5      | 37.66578571 | 15.7032372 | 1.263193837 | 0.0051956 | 0.0257422 |
| TNFAIP6    | 31.6662244  | 12.6930083 | 1.320380779 | 0.005674  | 0.0276899 |
| LINC02298  | 32.97788805 | 14.9628592 | 1.13885827  | 0.0078135 | 0.0358511 |
| CACNB4     | 41.8402173  | 20.2984312 | 1.043191063 | 0.0093145 | 0.0413924 |
| AC011330.1 | 46.21236225 | 18.2166927 | 1.340673695 | 0.0103476 | 0.0451639 |

**Table II . Comparison of whole blood profile between *Mettl3*<sup>Con</sup> and *Mettl3*<sup>KD</sup> mice.**

| Parameter (units)                       | <i>Mettl3</i> <sup>Con</sup> mice<br>(n=11, median ± SD) | <i>Mettl3</i> <sup>KD</sup> mice<br>(n=7, median ± SD) | <i>P</i> value |
|-----------------------------------------|----------------------------------------------------------|--------------------------------------------------------|----------------|
| White blood cells (×10 <sup>9</sup> /L) | 5.75±3.8                                                 | 9.3±2.4                                                | 0.15           |
| Lymphocytes (×10 <sup>9</sup> /L)       | 4.3±2.2                                                  | 5.9±1.9                                                | 0.14           |
| Monocytes (×10 <sup>9</sup> /L)         | 0.3±0.1                                                  | 0.3±0.06                                               | 0.91           |
| Granulocyte (×10 <sup>9</sup> /L)       | 2.7±1.3                                                  | 3.3±1.4                                                | 0.41           |
| Red blood cells (×10 <sup>12</sup> /L)  | 10.2±2.1                                                 | 9.36±1.4                                               | 0.64           |
| Platelets (×10 <sup>9</sup> /L)         | 1317±275                                                 | 1291±399.9                                             | 0.44           |
